# Supplementary material for: The Bacterial MtrAB Two-Component System Regulates the Cell Wall Homeostasis Responding to Environmental Alkaline Stress
Source: PubMed Central journal article supplement (PMC9602371; doi:10.1128/spectrum.02311-22), 2022-09-08
Supplement: spectrum.02311-22-s0001.pdf [file spectrum.02311-22-s0001.pdf]

## **Supplementary Information**

### **The bacterial MtrAB two-component system regulates the cell wall homeostasis responding to environmental alkaline stress**

Xiaoyu Qin<sup>1</sup>, Kaiduan Zhang<sup>1</sup>, Yuzhao Fan<sup>2</sup>, Hui Fang<sup>1</sup>, Yong Nie<sup>1\*</sup>, Xiao-Lei

Wu<sup>1,3,4\*</sup>

<sup>1</sup> College of Engineering, Peking University, Beijing 100871, China

<sup>2</sup> School of Resources and Environmental Engineering, Hefei University of  
Technology, Hefei 230009, China

<sup>3</sup> Institute of Ocean Research, Peking University, Beijing 100871, China

<sup>4</sup> Institute of Ecology, Peking University, Beijing 100871, China

\*Corresponding author: Research Scientist, College of Engineering, Peking University.

Tel: +86 10-62759047; Fax: +86 10-62759047; E-mail: nieyong@pku.edu.cn

\*Corresponding author: Professor, College of Engineering, Peking University.

Tel: +86 10-62759047; Fax: +86 10-62759047; E-mail: xiaolei\_wu@pku.edu.cn

Figure S1

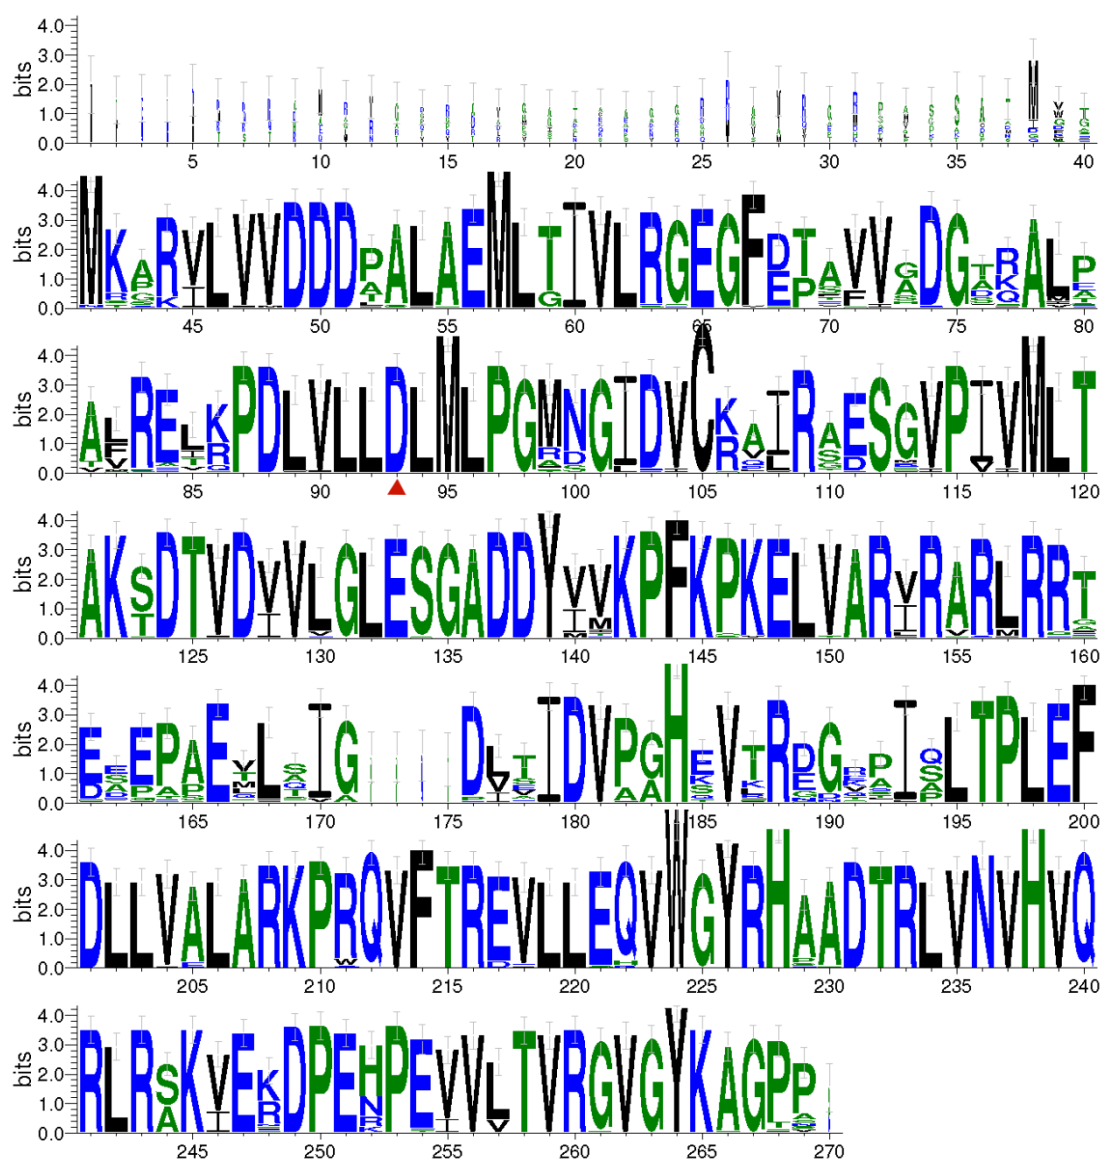

Fig S1. Comparison of the amino acid sequences of MtrA between *Dietzia* sp. DQ12-45-1b and other bacteria in Actinobacteria. The sequence logo was generated with WebLogo (<http://weblogo.threeplusone.com/create.cgi>). The red triangle represents the phosphorylation site.

Figure S2

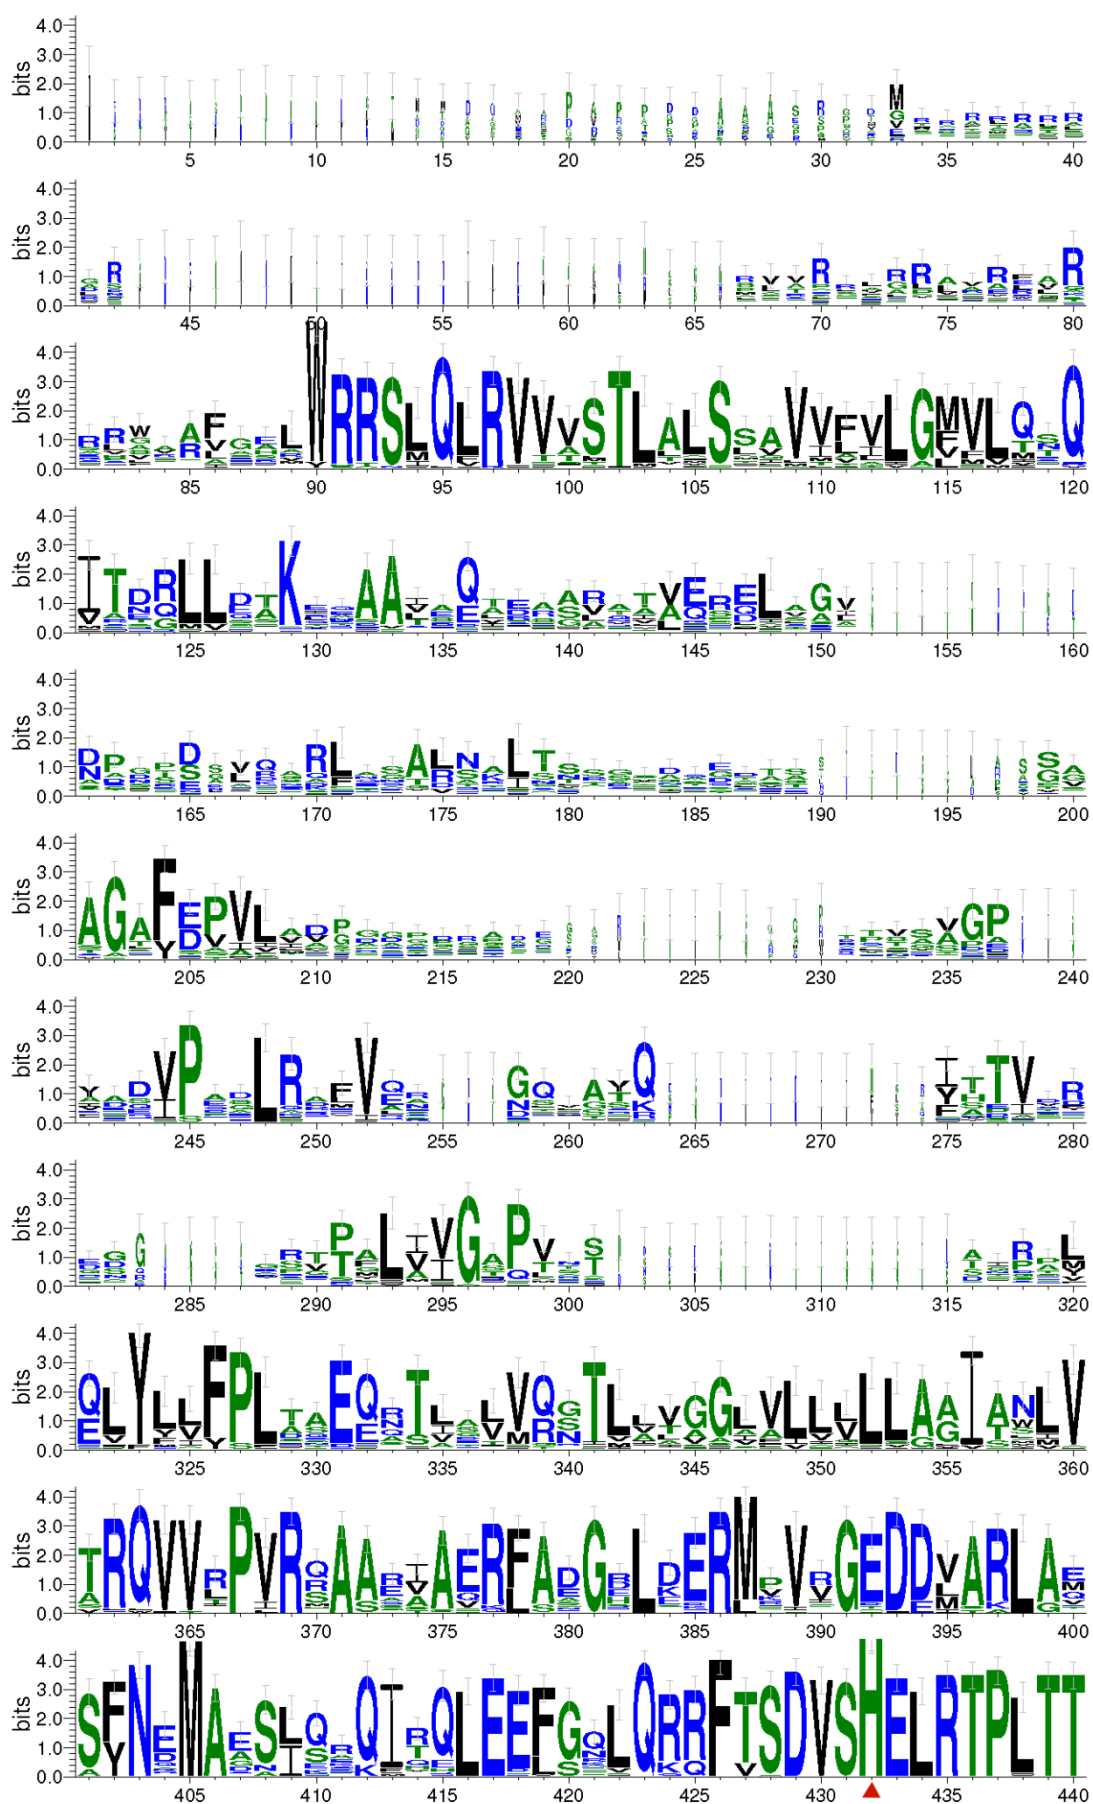

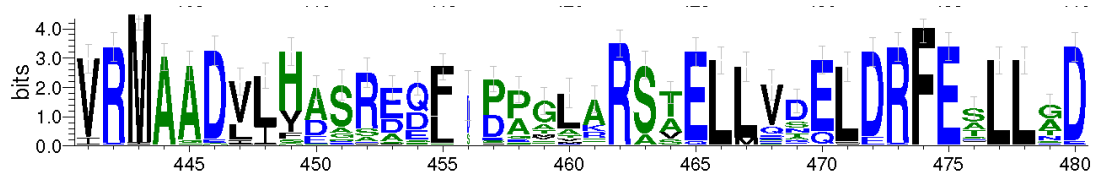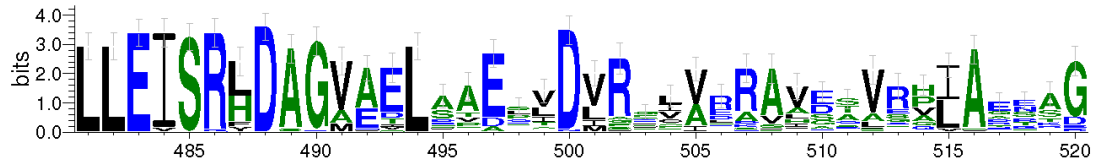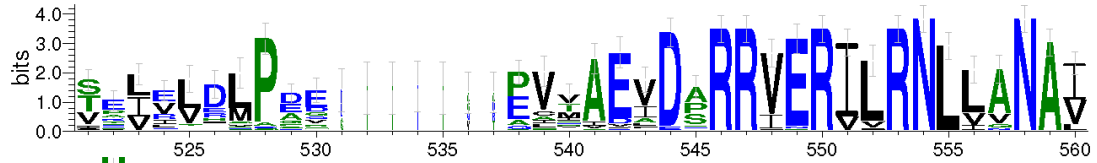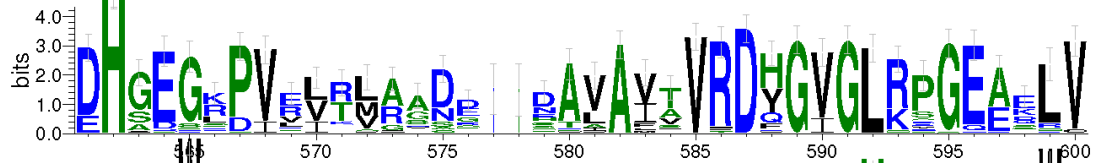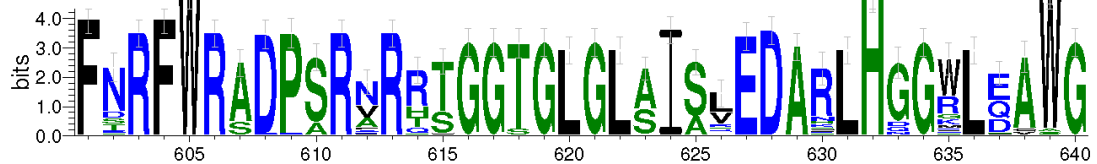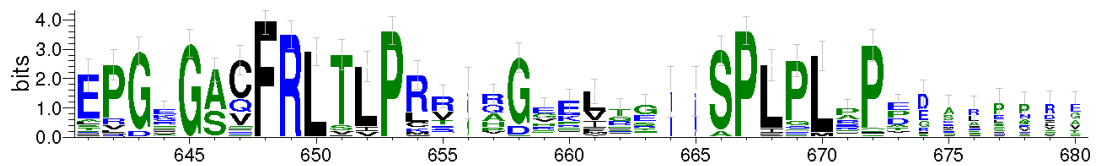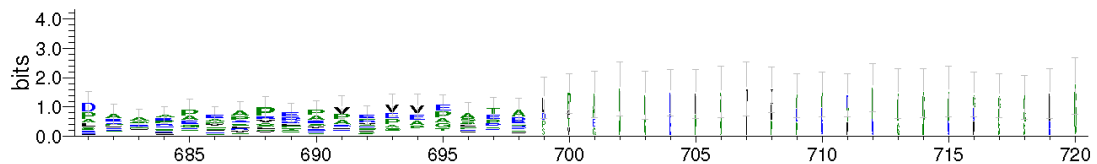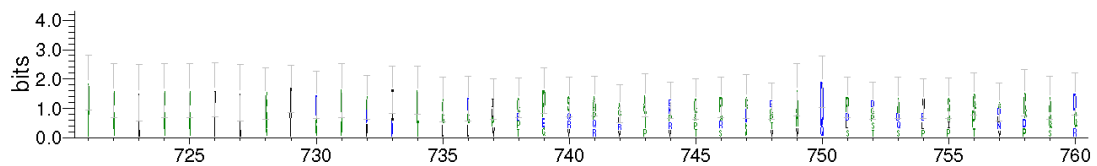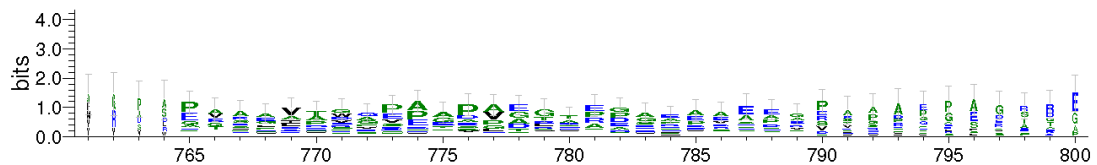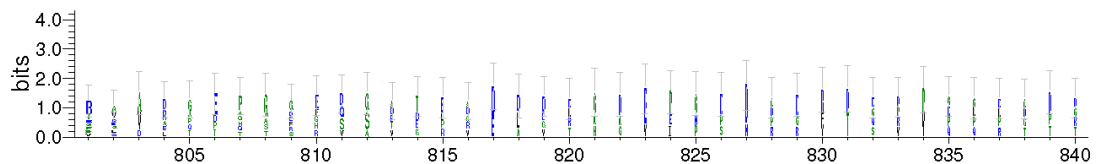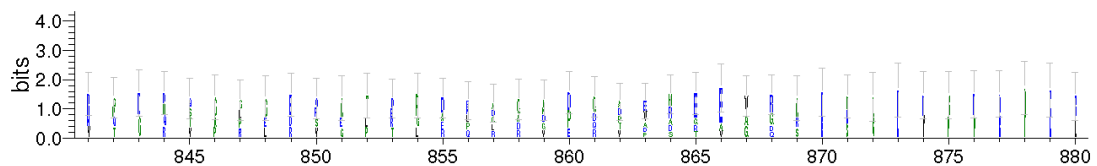

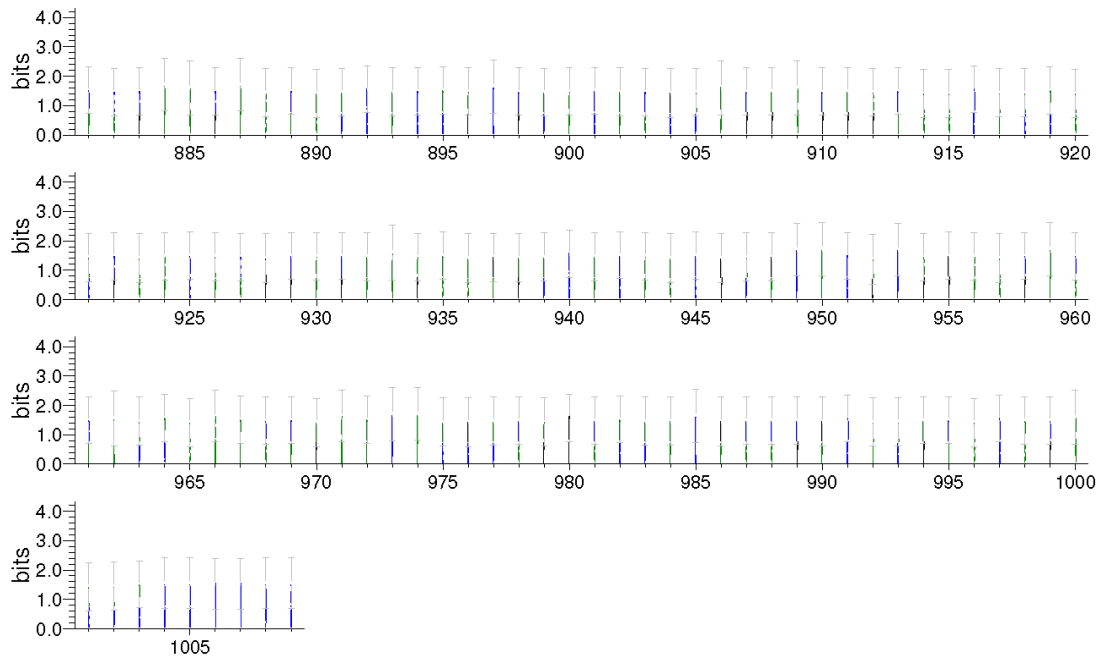

Fig S2. Comparison of the amino acid sequences of MtrB between *Dietzia* sp. DQ12-45-1b and other bacteria in Actinobacteria. The sequence logo was generated with WebLogo (<http://weblogo.threeplusone.com/create.cgi>). The red triangle represents the phosphorylation site.

**Figure S3**

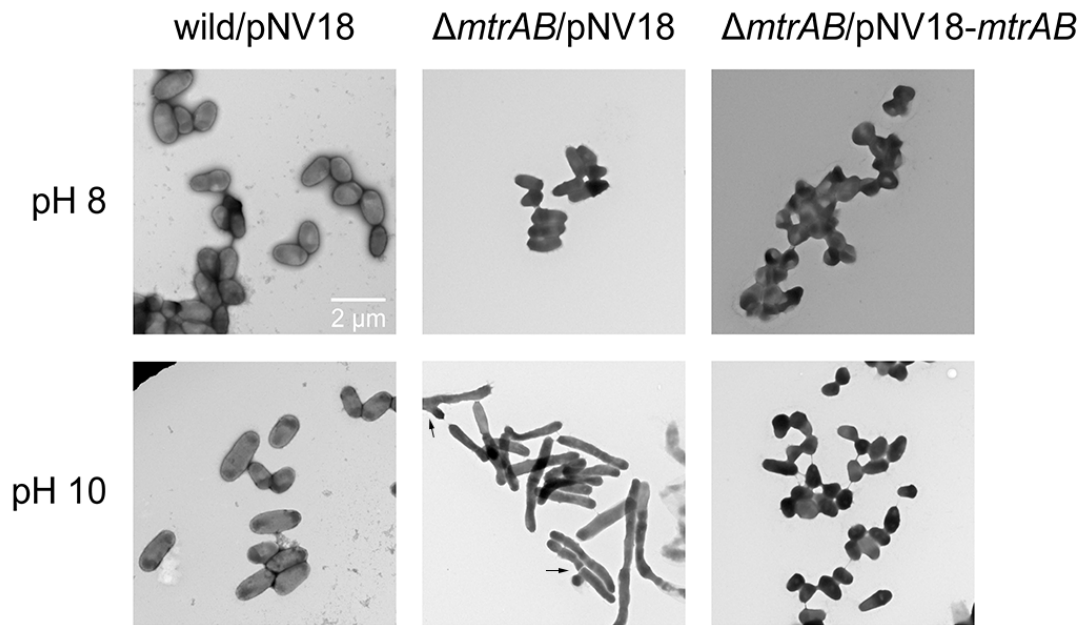

Fig S3. Cell morphology at different pH conditions. The representative micrographs of *Dietzia* sp. DQ12-45-1b wild/pNV18,  $\Delta mtrAB/pNV18$ , and  $\Delta mtrAB/pNV18-mtrAB$  by transmission electron microscope. Bars show the length in microns. Note the branched phenotype (marked with arrows) present in  $\Delta mtrAB/pNV18$  in pH 10.

Figure S4

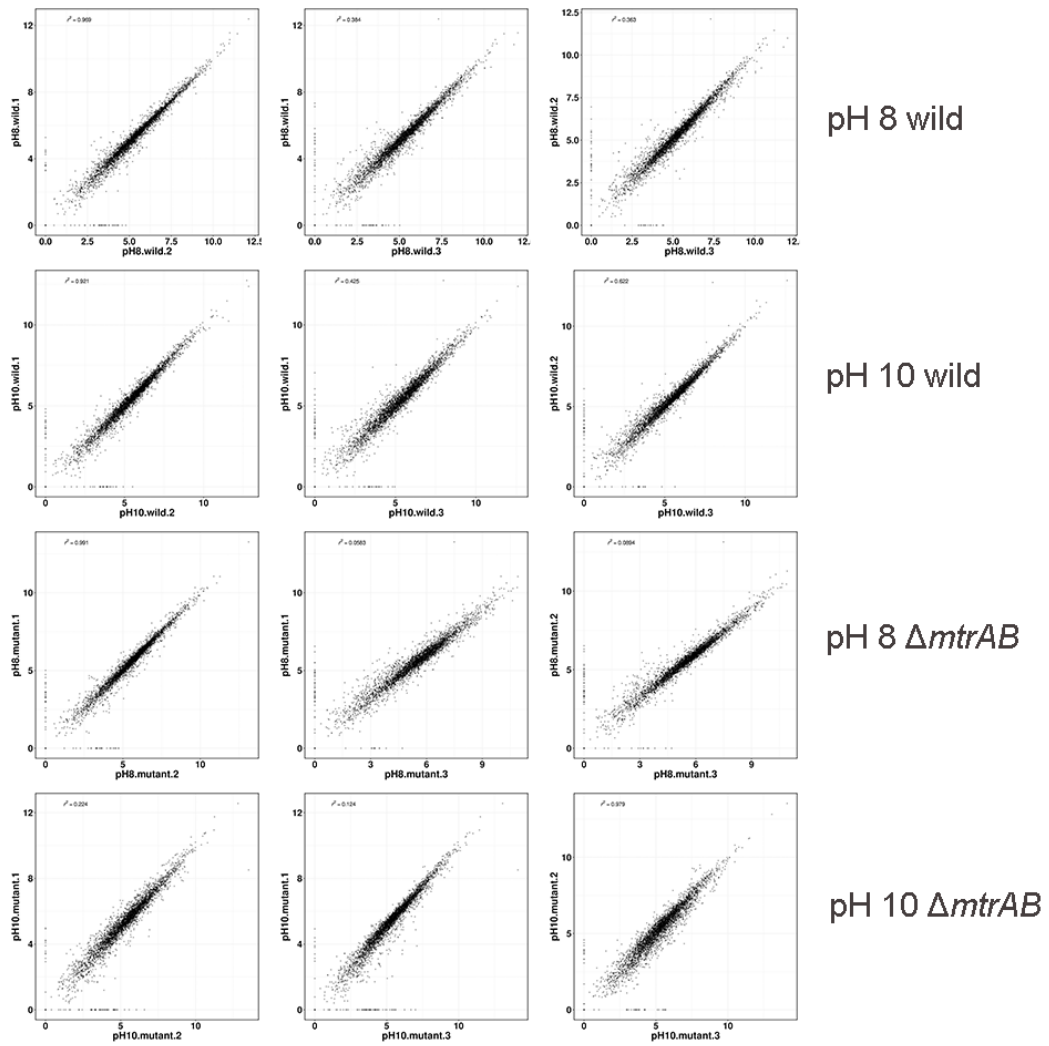

Fig S4. Scatter plots of consistency of transcriptomic data between parallel samples of *Dietzia* sp. DQ12-45-1b wild-type and  $\Delta mtrAB$  mutant strains under the optimal and alkaline pH conditions.

**Figure S5**

A pH 10 wild/pH 8 wild

Up-regulated genes

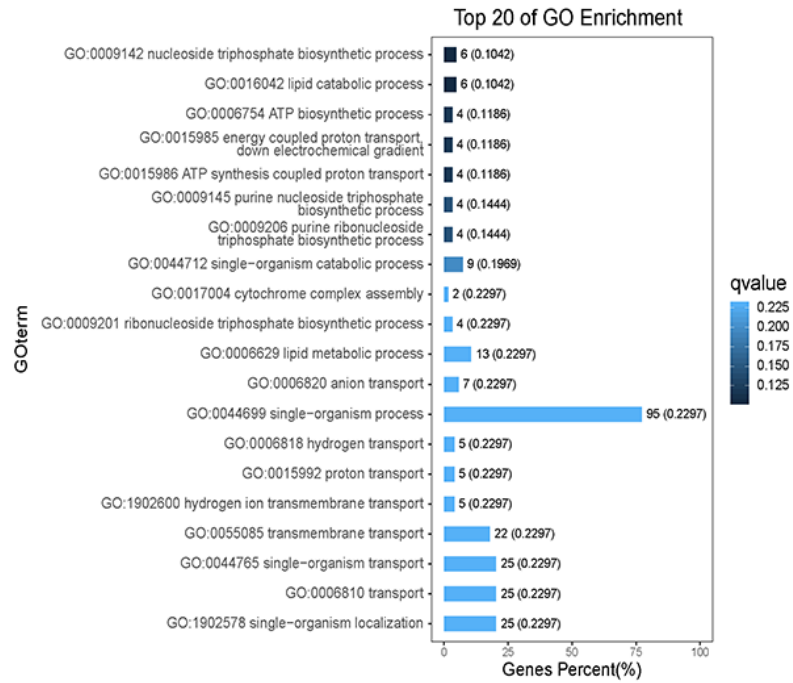

Down-regulated genes

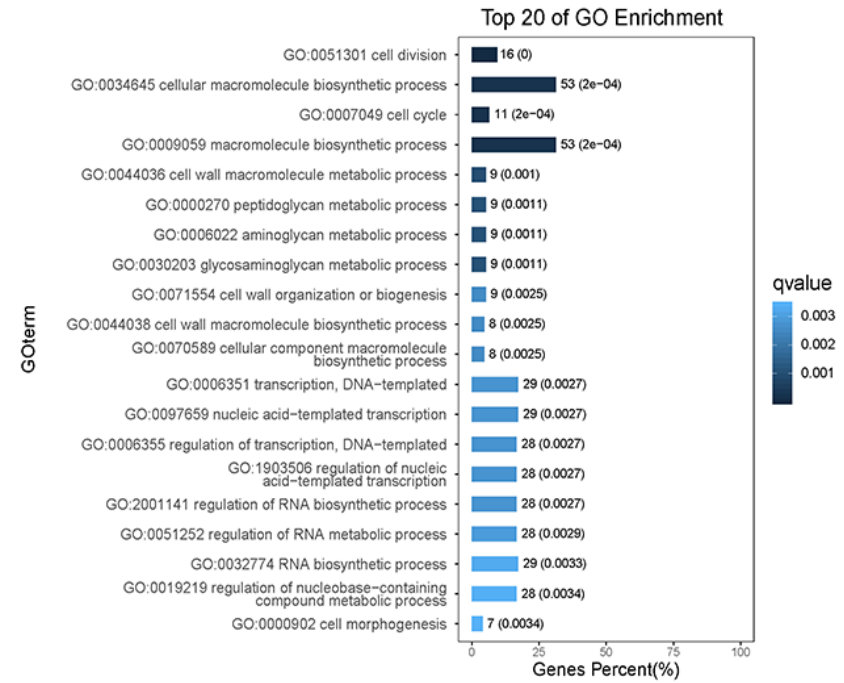



B pH 10  $\Delta mtrAB$ /pH 10 wild

Up-regulated genes

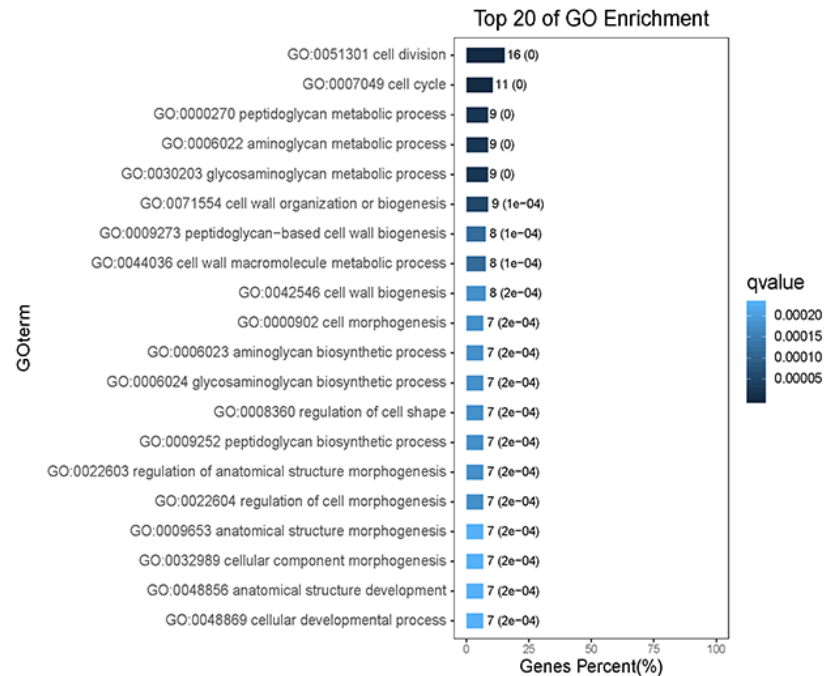

Down-regulated genes

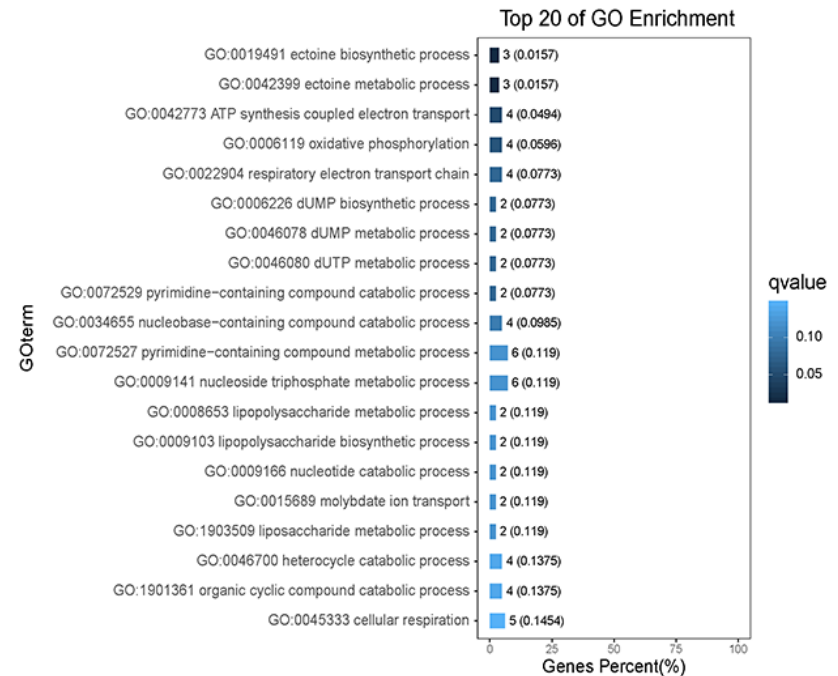

Fig S5. Gene Ontology (GO) classification and enrichment analysis. (A) Barplots of GO enriched from up-regulated genes and down-regulated genes of wild-type strain at pH 10 compared to pH 8 in Biological Process (BP) categories. (B) Barplots of GO enriched from up-regulated genes and down-regulated genes of  $\Delta mtrAB$  mutant compared to wild-type strains at pH 10 in BP categories.

Figure S6

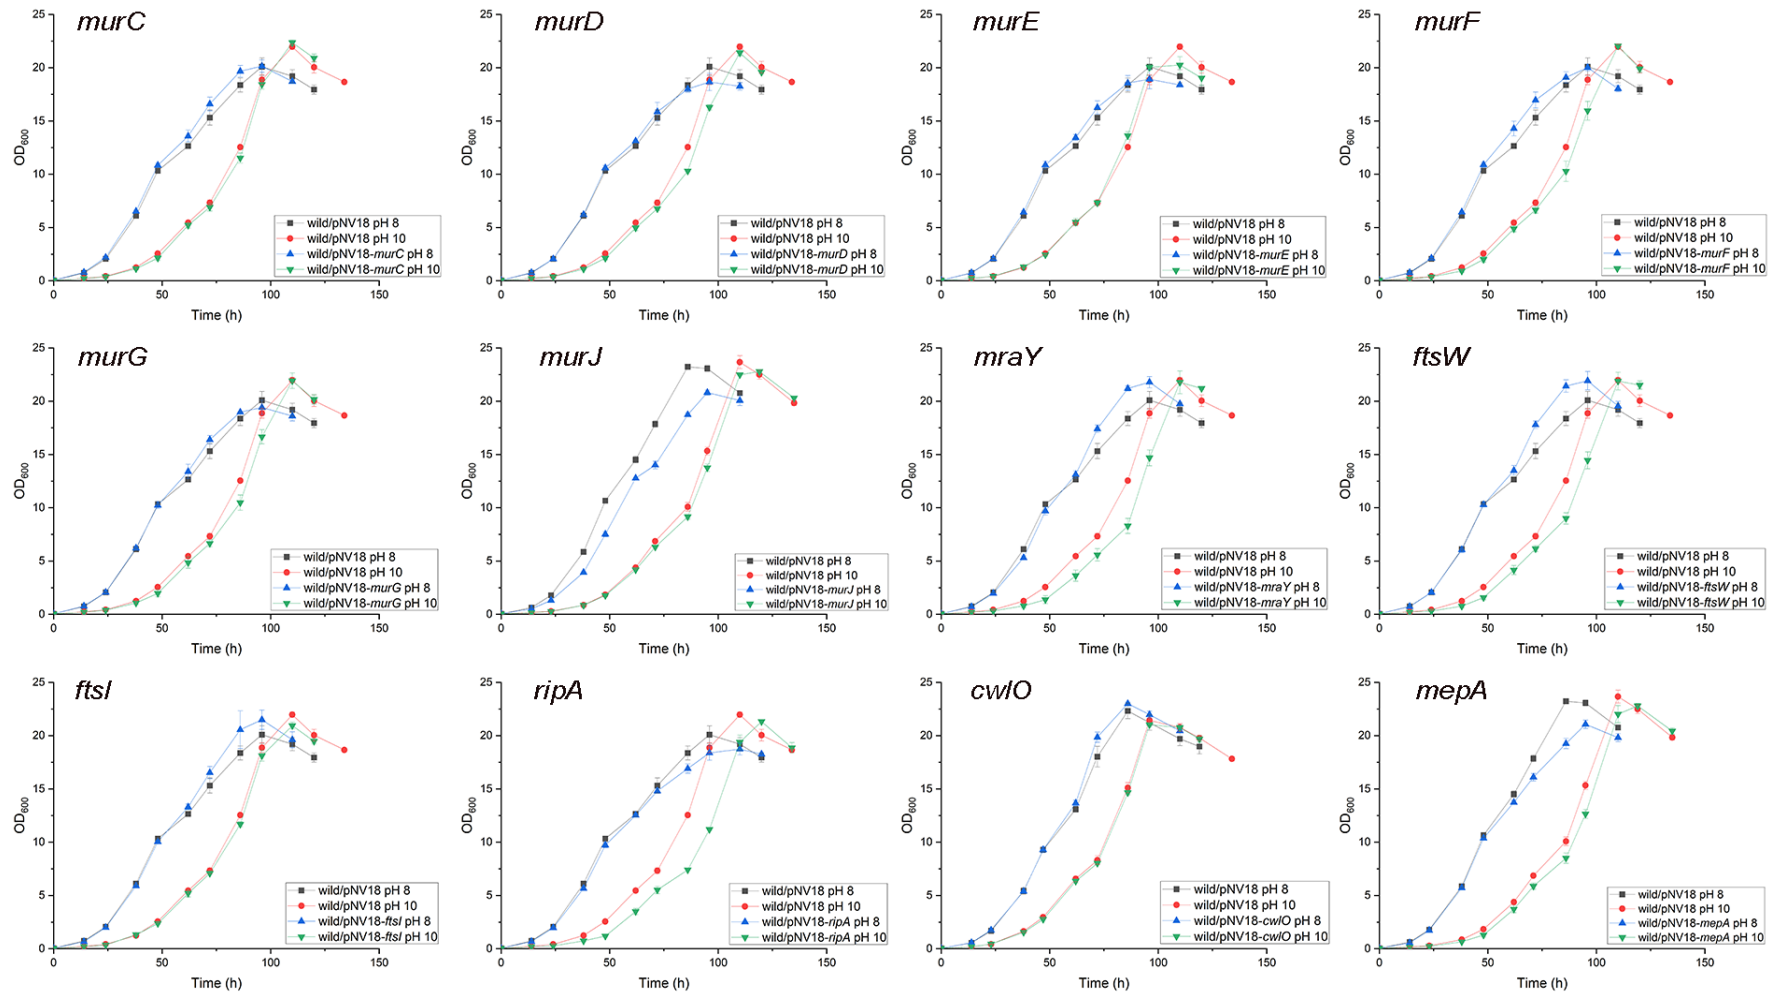

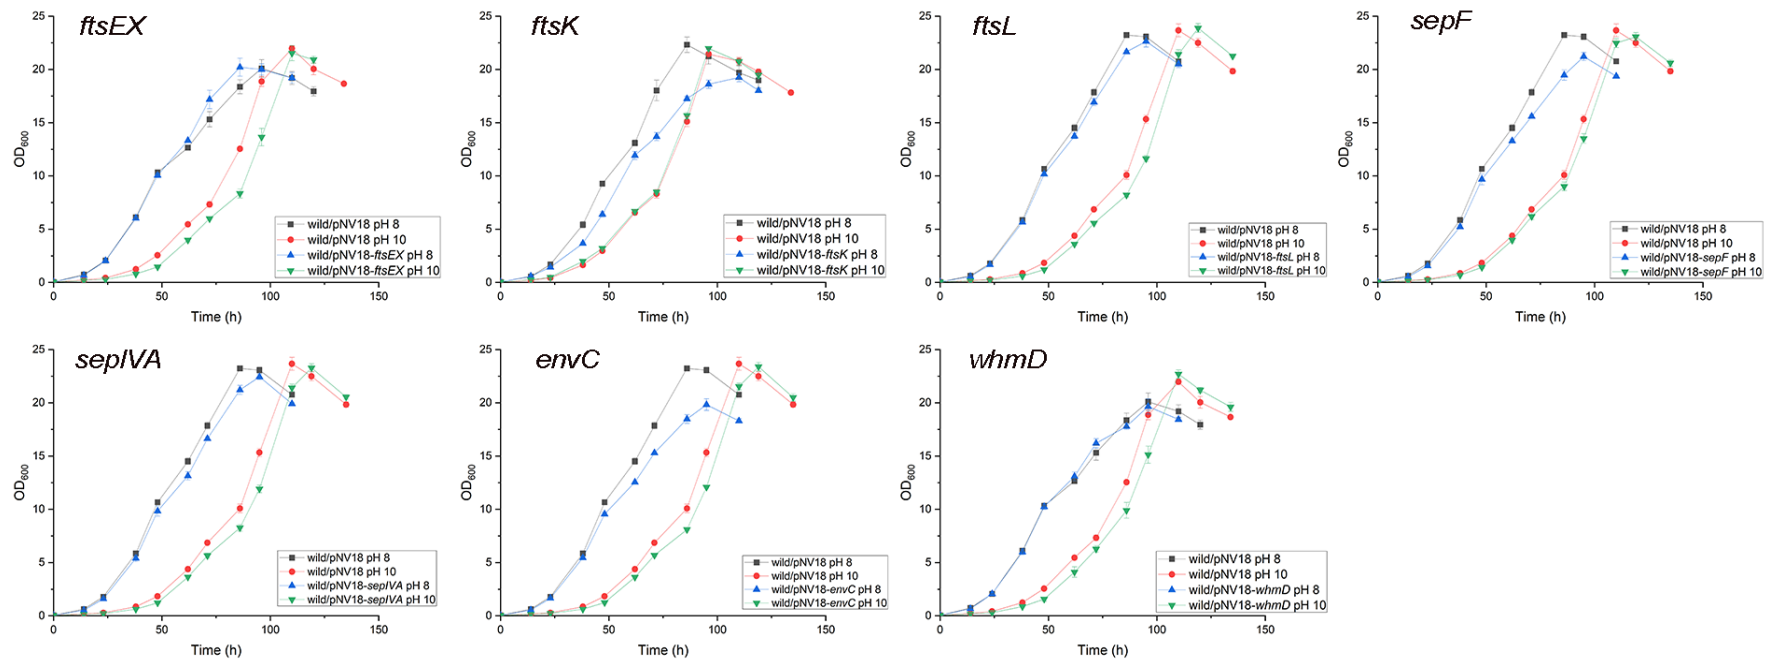

Fig S6. Growth curves of *Dietzia* sp. DQ12-45-1b wild-type strains overexpressing the genes involved in peptidoglycan homeostasis and cell division at different pH conditions. Black square and red circle represent wild-type strain carrying pNV18 at pH 8 and pH 10 respectively. Blue triangle and green inverted triangle mean wild/pNV18 with different genes at pH 8 and pH 10 respectively.

**Figure S7**

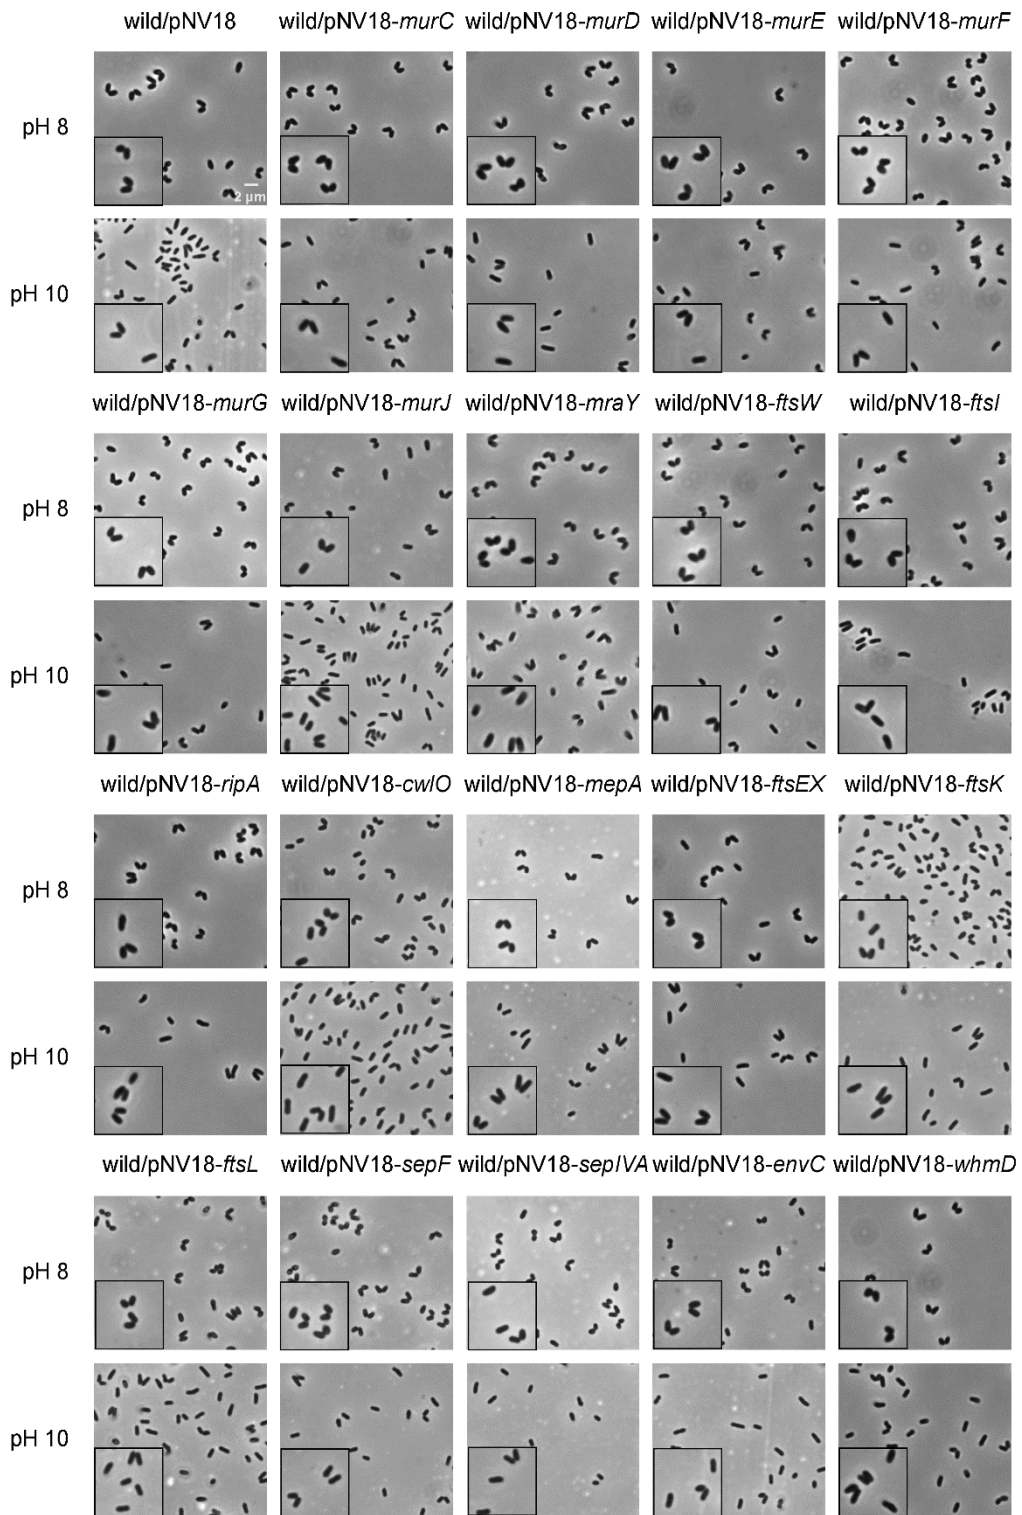

Fig S7. The representative micrographs of *Dietzia* sp. DQ12-45-1b wild-type strains overexpressing the genes involved in peptidoglycan homeostasis and cell division at different pH conditions.

**Figure S8**

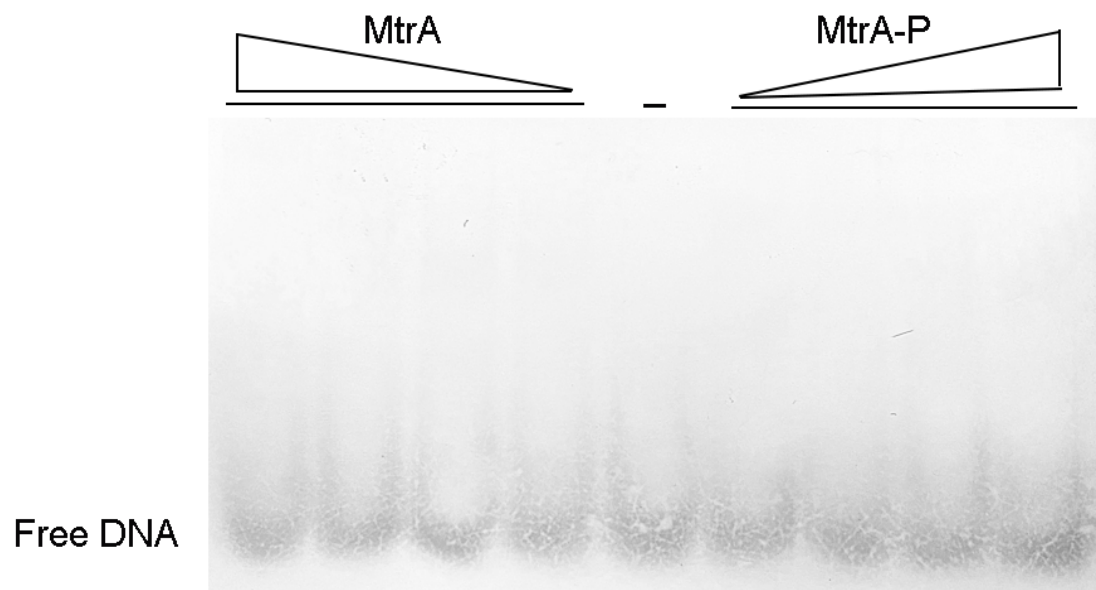

Fig S8. EMSA analysis of MtrA, MtrA-P binding to non-specific DNA (*Escherichia coli* DNA fragment) used as a negative control. MtrA, and MtrA~P at 0.5, 1, 2.5, and 5  $\mu\text{M}$  concentration were incubated for 30 min with 0.1  $\mu\text{M}$  of DIG-labeled DNA.

**Table S1**

Table S1 List of selected up- and down-regulated genes

| Gene ID                 | Gene name   | pH10 wild/pH8 wild  |       | pH10 $\Delta mtrAB$ /pH10 wild |       | pH8 $\Delta mtrAB$ /pH8 wild |       | Gene product description                                                                 |
|-------------------------|-------------|---------------------|-------|--------------------------------|-------|------------------------------|-------|------------------------------------------------------------------------------------------|
|                         |             | Log <sub>2</sub> FC | FDR   | Log <sub>2</sub> FC            | FDR   | Log <sub>2</sub> FC          | FDR   |                                                                                          |
| Peptidoglycan synthesis |             |                     |       |                                |       |                              |       |                                                                                          |
| GJR88_02065             | <i>murE</i> | -1.45               | 0.000 | 2.44                           | 0.000 | 0.21                         | 0.326 | UDP-N-acetylmuramoylalanyl-D-glutamate--2,6-diaminopimelate ligase                       |
| GJR88_02066             | <i>murF</i> | -1.55               | 0.000 | 2.93                           | 0.000 | 0.45                         | 0.021 | UDP-N-acetylmuramoyl-tripeptide--D-alanyl-D-alanine ligase                               |
| GJR88_02068             | <i>mraY</i> | -1.34               | 0.000 | 2.85                           | 0.000 | 0.52                         | 0.003 | phospho-N-acetylmuramoyl-pentapeptide-transferase                                        |
| GJR88_02071             | <i>murD</i> | -2.27               | 0.000 | 2.91                           | 0.000 | -0.46                        | 0.028 | UDP-N-acetylmuramoyl-L-alanyl-D-glutamate synthetase                                     |
| GJR88_02073             | <i>ftsW</i> | -2.70               | 0.000 | 2.64                           | 0.000 | -0.82                        | 0.000 | Cell division protein                                                                    |
| GJR88_05430             | <i>murJ</i> | -1.06               | 0.000 | 1.43                           | 0.000 | -0.10                        | 0.676 | Lipid II flippase                                                                        |
| GJR88_02075             | <i>murG</i> | -1.55               | 0.000 | 2.60                           | 0.000 | 0.44                         | 0.083 | UDP-N-acetylglucosamine--N-acetylmuramyl-pyrophosphoryl-undecaprenol N-acetylglucosamine |
| GJR88_02077             | <i>murC</i> | -1.53               | 0.000 | 2.65                           | 0.000 | 0.56                         | 0.003 | UDP-N-acetylmuramate--L-alanine ligase                                                   |

|                          |                                |       |       |      |       |       |       |                                              |
|--------------------------|--------------------------------|-------|-------|------|-------|-------|-------|----------------------------------------------|
| GJR88<br>_02062          | <i>ftsI</i><br>( <i>pbpB</i> ) | -1.58 | 0.000 | 2.61 | 0.000 | -0.09 | 0.723 | Penicillin-binding protein                   |
| Peptidoglycan hydrolysis |                                |       |       |      |       |       |       |                                              |
| GJR88<br>_02580          | <i>ripA</i>                    | -2.39 | 0.000 | 1.85 | 0.000 | 1.63  | 0.000 | Peptidoglycan endopeptidase                  |
| GJR88<br>_04713          | NA                             | -2.59 | 0.000 | 3.89 | 0.000 | 1.06  | 0.000 | 1,4-beta-N-acetylmuramidase                  |
| GJR88<br>_02028          | <i>cwlO</i>                    | -1.55 | 0.000 | 2.28 | 0.000 | 2.41  | 0.000 | Peptidoglycan endopeptidase                  |
| GJR88<br>_00456          | NA                             | -2.13 | 0.000 | 3.54 | 0.000 | 0.70  | 0.001 | N-acetylmuramoyl-L-alanine amidase           |
| GJR88<br>_03658          | <i>mepA</i>                    | -0.41 | 0.125 | 1.84 | 0.000 | 2.09  | 0.000 | Murein DD-endopeptidase                      |
| GJR88<br>_RS174<br>45    | NA                             | -1.23 | 0.000 | 0.82 | 0.000 | 0.40  | 0.059 | M23 peptidase domain-containing protein      |
| GJR88<br>_03129          | NA                             | -1.31 | 0.000 | 0.79 | 0.009 | 0.93  | 0.001 | Membrane-bound lytic murein transglycosylase |
| Cell division            |                                |       |       |      |       |       |       |                                              |
| GJR88<br>_02816          | <i>ftsK</i>                    | -2.44 | 0.000 | 3.47 | 0.000 | -0.43 | 0.032 | Cell division protein                        |
| GJR88<br>_01576          | <i>ftsE</i>                    | -1.55 | 0.000 | 1.24 | 0.000 | -0.13 | 0.604 | Cell division ATP-binding protein            |
| GJR88<br>_01577          | <i>ftsX</i>                    | -2.16 | 0.000 | 3.45 | 0.000 | 0.49  | 0.054 | Cell division protein                        |
| GJR88                    | <i>ftsL</i>                    | -2.91 | 0.000 | 3.98 | 0.000 | -0.32 | 0.137 | Cell division protein                        |





---

|                 |             |       |       |       |       |       |       |                                                                |
|-----------------|-------------|-------|-------|-------|-------|-------|-------|----------------------------------------------------------------|
| GJR88<br>_00770 | <i>mrpE</i> | -1.33 | 0.000 | 0.81  | 0.012 | -1.10 | 0.000 | Putative monovalent cation/H <sup>+</sup> antiporter subunit E |
| GJR88<br>_00771 | <i>mrpD</i> | -1.19 | 0.000 | 0.30  | 0.184 | -1.07 | 0.000 | Putative monovalent cation/H <sup>+</sup> antiporter subunit D |
| GJR88<br>_00774 | <i>mrpC</i> | -1.31 | 0.000 | 0.04  | 0.947 | -1.34 | 0.000 | Putative monovalent cation/H <sup>+</sup> antiporter subunit C |
| GJR88<br>_00777 | <i>mrpA</i> | 0.42  | 0.039 | -0.71 | 0.000 | -0.16 | 0.456 | Putative monovalent cation/H <sup>+</sup> antiporter subunit A |
| GJR88<br>_04437 | <i>mrpA</i> | 0.80  | 0.000 | -0.35 | 0.140 | 0.28  | 0.200 | Putative monovalent cation/H <sup>+</sup> antiporter subunit A |
| GJR88<br>_04438 | <i>mrpC</i> | -0.59 | 0.064 | 0.41  | 0.277 | -0.84 | 0.005 | Putative monovalent cation/H <sup>+</sup> antiporter subunit C |
| GJR88<br>_04440 | <i>mrpD</i> | -0.54 | 0.023 | 0.67  | 0.006 | -0.77 | 0.001 | Putative monovalent cation/H <sup>+</sup> antiporter subunit D |
| GJR88<br>_04442 | <i>mrpE</i> | -0.45 | 0.100 | 0.44  | 0.142 | -1.14 | 0.000 | Putative monovalent cation/H <sup>+</sup> antiporter subunit E |
| GJR88<br>_04443 | <i>mrpF</i> | -1.31 | 0.001 | 0.31  | 0.571 | -1.97 | 0.000 | Putative monovalent cation/H <sup>+</sup> antiporter subunit F |
| GJR88<br>_04444 | <i>mrpG</i> | -0.01 | 0.990 | 0.00  | 1.000 | -0.69 | 0.005 | Putative monovalent cation/H <sup>+</sup> antiporter subunit G |

---

**Table S2**

Table S2 Strains and plasmids used in the study.

| Strain or plasmid                                | Genotype and description                                                                        | Source and reference |
|--------------------------------------------------|-------------------------------------------------------------------------------------------------|----------------------|
| <i>Dietzia</i> strains                           |                                                                                                 |                      |
| <i>Dietzia</i> sp. DQ12-45-1b (CGMCC 1.10709)    | Wild-type                                                                                       | (1)                  |
| DQ12-45-1b/pNV18                                 | Wild-type harboring pNV18; Km <sup>r</sup>                                                      | This study           |
| DQ12-45-1bΔ <i>mtrAB</i>                         | DQ12-45-1b <i>mtrAB</i> deletion mutant; Sm <sup>r</sup>                                        | This study           |
| DQ12-45-1bΔ <i>mtrAB</i> /pNV18                  | DQ12-45-1b <i>mtrAB</i> deletion mutant harboring pNV18; Km <sup>r</sup> and Sm <sup>r</sup>    | This study           |
| DQ12-45-1bΔ <i>mtrAB</i> /pNV18- <i>mtrAB</i>    | DQ12-45-1bΔ <i>mtrAB</i> harboring pNV18- <i>mtrAB</i> ; Km <sup>r</sup> and Sm <sup>r</sup>    | This study           |
| DQ12-45-1bΔ <i>mtrAB</i> /pNV18- <i>mtrA</i>     | DQ12-45-1bΔ <i>mtrAB</i> harboring pNV18- <i>mtrA</i> ; Km <sup>r</sup> and Sm <sup>r</sup>     | This study           |
| DQ12-45-1bΔ <i>mtrAB</i> /pNV18- <i>mtrAD56E</i> | DQ12-45-1bΔ <i>mtrAB</i> harboring pNV18- <i>mtrAD56E</i> ; Km <sup>r</sup> and Sm <sup>r</sup> | This study           |
| DQ12-45-1bΔ <i>mtrAB</i> /pNV18- <i>mtrAD56N</i> | DQ12-45-1bΔ <i>mtrAB</i> harboring pNV18- <i>mtrAD56N</i> ; Km <sup>r</sup> and Sm <sup>r</sup> | This study           |
| DQ12-45-1b/pJV                                   | Wild-type harboring pJV; Km <sup>r</sup>                                                        | This study           |
| DQ12-45-1b/pJV- <i>mraZ</i>                      | Wild-type harboring pJV- <i>mraZ</i> ; Km <sup>r</sup>                                          | This study           |

---

|                                                        |                                                                                                      |            |
|--------------------------------------------------------|------------------------------------------------------------------------------------------------------|------------|
| DQ12-45-1b $\Delta$ <i>mtrAB</i> /pJV                  | DQ12-45-1b $\Delta$ <i>mtrAB</i> harboring pJV; Km <sup>r</sup> and Sm <sup>r</sup>                  | This study |
| DQ12-45-1b $\Delta$ <i>mtrAB</i> /pJV- <i>mraZ</i> -AS | DQ12-45-1b $\Delta$ <i>mtrAB</i> harboring pJV- <i>mraZ</i> -AS; Km <sup>r</sup> and Sm <sup>r</sup> | This study |
| DQ12-45-1b/pNV18- <i>murC</i>                          | Wild-type harboring pNV18- <i>murC</i> ; Km <sup>r</sup>                                             | This study |
| DQ12-45-1b/pNV18- <i>murD</i>                          | Wild-type harboring pNV18- <i>murD</i> ; Km <sup>r</sup>                                             | This study |
| DQ12-45-1b/pNV18- <i>murE</i>                          | Wild-type harboring pNV18- <i>murE</i> ; Km <sup>r</sup>                                             | This study |
| DQ12-45-1b/pNV18- <i>murF</i>                          | Wild-type harboring pNV18- <i>murF</i> ; Km <sup>r</sup>                                             | This study |
| DQ12-45-1b/pNV18- <i>murG</i>                          | Wild-type harboring pNV18- <i>murG</i> ; Km <sup>r</sup>                                             | This study |
| DQ12-45-1b/pNV18- <i>murJ</i>                          | Wild-type harboring pNV18- <i>murJ</i> ; Km <sup>r</sup>                                             | This study |
| DQ12-45-1b/pNV18- <i>mraY</i>                          | Wild-type harboring pNV18- <i>mraY</i> ; Km <sup>r</sup>                                             | This study |
| DQ12-45-1b/pNV18- <i>ftsW</i>                          | Wild-type harboring pNV18- <i>ftsW</i> ; Km <sup>r</sup>                                             | This study |
| DQ12-45-1b/pNV18- <i>ftsI</i>                          | Wild-type harboring pNV18- <i>ftsI</i> ; Km <sup>r</sup>                                             | This study |
| DQ12-45-1b/pNV18- <i>ripA</i>                          | Wild-type harboring pNV18- <i>ripA</i> ; Km <sup>r</sup>                                             | This study |
| DQ12-45-1b/pNV18- <i>cwlO</i>                          | Wild-type harboring pNV18- <i>cwlO</i> ; Km <sup>r</sup>                                             | This study |
| DQ12-45-1b/pNV18- <i>mepA</i>                          | Wild-type harboring pNV18- <i>mepA</i> ; Km <sup>r</sup>                                             | This study |
| DQ12-45-1b/pNV18- <i>ftsEX</i>                         | Wild-type harboring pNV18- <i>ftsEX</i> ; Km <sup>r</sup>                                            | This study |
| DQ12-45-1b/pNV18- <i>ftsK</i>                          | Wild-type harboring pNV18- <i>ftsK</i> ; Km <sup>r</sup>                                             | This study |
| DQ12-45-1b/pNV18- <i>ftsL</i>                          | Wild-type harboring pNV18- <i>ftsL</i> ; Km <sup>r</sup>                                             | This study |
| DQ12-45-1b/pNV18- <i>sepF</i>                          | Wild-type harboring pNV18- <i>sepF</i> ; Km <sup>r</sup>                                             | This study |
| DQ12-45-1b/pNV18- <i>sepIVA</i>                        | Wild-type harboring pNV18- <i>sepIVA</i> ; Km <sup>r</sup>                                           | This study |

---

|                                     |                                                                                      |            |
|-------------------------------------|--------------------------------------------------------------------------------------|------------|
| DQ12-45-1b/pNV18- <i>envC</i>       | Wild-type harboring pNV18- <i>envC</i> ; Km <sup>r</sup>                             | This study |
| DQ12-45-1b/pNV18- <i>whmD</i>       | Wild-type harboring pNV18- <i>whmD</i> ; Km <sup>r</sup>                             | This study |
| <i>Escherichia coli</i> strains     |                                                                                      |            |
| BL21 (DE3)/pET-28a- <i>envZdel</i>  | BL21 (DE3) harboring pET-28a- <i>envZdel</i> ; Km <sup>r</sup>                       | This study |
| BL21 (DE3)/pET-28a- <i>mtrA</i>     | BL21 (DE3) harboring pET-28a- <i>mtrA</i> ; Km <sup>r</sup>                          | This study |
| BL21 (DE3)/pET-28a- <i>mtrAD56E</i> | BL21 (DE3) harboring pET-28a- <i>mtrAD56E</i> ; Km <sup>r</sup>                      | This study |
| BL21 (DE3)/pET-28a- <i>mtrAD56N</i> | BL21 (DE3) harboring pET-28a- <i>mtrAD56N</i> ; Km <sup>r</sup>                      | This study |
| Plasmids                            |                                                                                      |            |
| pNV18-DsRed.T4                      | <i>Dietzia-E.coli</i> shuttle vector (p45 promoter); Km <sup>r</sup>                 | (2)        |
| pNV18                               | Cloned from pNV18-DsRed.T4 without DsRed; Km <sup>r</sup>                            | This study |
| pNV18- <i>mtrAB</i>                 | pNV18 + <i>mtrA</i> and <i>mtrB</i> from DQ12-45-1b; Km <sup>r</sup>                 | This study |
| pNV18- <i>mtrA</i>                  | pNV18 + <i>mtrA</i> from DQ12-45-1b; Km <sup>r</sup>                                 | This study |
| pNV18- <i>mtrAD56E</i>              | pNV18 + <i>mtrA</i> (phosphorylation-mimic) from DQ12-45-1b; Km <sup>r</sup>         | This study |
| pNV18- <i>mtrAD56N</i>              | pNV18 + <i>mtrA</i> (phosphorylation-defective) from DQ12-45-1b; Km <sup>r</sup>     | This study |
| pJV53                               | <i>Dietzia-E.coli</i> shuttle vector (acetamide-inducible promoter); Km <sup>r</sup> | (3)        |
| pJV                                 | Cloned from pJV53 without Che9cp60 and Che9cp61; Km <sup>r</sup>                     | This study |

---

|                      |                                                                             |            |
|----------------------|-----------------------------------------------------------------------------|------------|
| pJV- <i>mraZ</i>     | pJV + <i>mraZ</i> from DQ12-45-1b; Km <sup>r</sup>                          | This study |
| pJV- <i>mraZ</i> -AS | pJV + <i>mraZ</i> in antisense orientation from DQ12-45-1b; Km <sup>r</sup> | This study |
| pNV18- <i>murC</i>   | pNV18 + <i>murC</i> from DQ12-45-1b; Km <sup>r</sup>                        | This study |
| pNV18- <i>murD</i>   | pNV18 + <i>murD</i> from DQ12-45-1b; Km <sup>r</sup>                        | This study |
| pNV18- <i>murE</i>   | pNV18 + <i>murE</i> from DQ12-45-1b; Km <sup>r</sup>                        | This study |
| pNV18- <i>murF</i>   | pNV18 + <i>murF</i> from DQ12-45-1b; Km <sup>r</sup>                        | This study |
| pNV18- <i>murG</i>   | pNV18 + <i>murG</i> from DQ12-45-1b; Km <sup>r</sup>                        | This study |
| pNV18- <i>murJ</i>   | pNV18 + <i>murJ</i> from DQ12-45-1b; Km <sup>r</sup>                        | This study |
| pNV18- <i>mraY</i>   | pNV18 + <i>mraY</i> from DQ12-45-1b; Km <sup>r</sup>                        | This study |
| pNV18- <i>ftsW</i>   | pNV18 + <i>ftsW</i> from DQ12-45-1b; Km <sup>r</sup>                        | This study |
| pNV18- <i>ftsI</i>   | pNV18 + <i>ftsI</i> from DQ12-45-1b; Km <sup>r</sup>                        | This study |
| pNV18- <i>ripA</i>   | pNV18 + <i>ripA</i> from DQ12-45-1b; Km <sup>r</sup>                        | This study |
| pNV18- <i>cwlO</i>   | pNV18 + <i>cwlO</i> from DQ12-45-1b; Km <sup>r</sup>                        | This study |
| pNV18- <i>mepA</i>   | pNV18 + <i>mepA</i> from DQ12-45-1b; Km <sup>r</sup>                        | This study |
| pNV18- <i>ftsEX</i>  | pNV18 + <i>ftsEX</i> from DQ12-45-1b; Km <sup>r</sup>                       | This study |
| pNV18- <i>ftsK</i>   | pNV18 + <i>ftsK</i> from DQ12-45-1b; Km <sup>r</sup>                        | This study |
| pNV18- <i>ftsL</i>   | pNV18 + <i>ftsL</i> from DQ12-45-1b; Km <sup>r</sup>                        | This study |
| pNV18- <i>sepF</i>   | pNV18 + <i>sepF</i> from DQ12-45-1b; Km <sup>r</sup>                        | This study |
| pNV18- <i>sepIVA</i> | pNV18 + <i>sepIVA</i> from DQ12-45-1b; Km <sup>r</sup>                      | This study |

---

---

|                                     |                                                                                               |            |
|-------------------------------------|-----------------------------------------------------------------------------------------------|------------|
| pNV18- <i>envC</i>                  | pNV18 + <i>envC</i> from DQ12-45-1b; Km <sup>r</sup>                                          | This study |
| pNV18- <i>whmD</i>                  | pNV18 + <i>whmD</i> from DQ12-45-1b; Km <sup>r</sup>                                          | This study |
| pET-28a                             | Overexpression vector; Km <sup>r</sup>                                                        | Novagen    |
| pET-28a- <i>envZ<sub>del</sub></i>  | pET-28a + truncated <i>envZ</i> from <i>E.coli</i> ; Km <sup>r</sup>                          | This study |
| pET-28a- <i>mtrA</i>                | pET-28a + <i>mtrA</i> from DQ12-45-1b; Km <sup>r</sup>                                        | This study |
| pET-28a- <i>mtrA<sub>D56E</sub></i> | pET-28a + <i>mtrA<sub>D56E</sub></i> from pNV18- <i>mtrA<sub>D56E</sub></i> ; Km <sup>r</sup> | This study |
| pET-28a- <i>mtrA<sub>D56N</sub></i> | pET-28a + <i>mtrA<sub>D56N</sub></i> from pNV18- <i>mtrA<sub>D56N</sub></i> ; Km <sup>r</sup> | This study |

---

**Table S3**

Table S3 Primers used in the study.

| Primer  | Sequence (5' → 3')                       | Application                        |
|---------|------------------------------------------|------------------------------------|
| mtrABLF | TGCTGTTCGCCCTGGACC                       | <i>ΔmtrAB</i> mutant strain        |
| mtrABLR | CCTTCATCCGTTTCCACGGTTCGTCGTCGACGACGAGGA  |                                    |
| mtrABRF | AAGCGTGCATAATAAGCCCTCTCGACCACTCGGAGTCCAA |                                    |
| mtrABRR | ACCGGACGGAGAGAAGGTGT                     |                                    |
| SmF     | ACCGTGGAAACGGATGAAGG                     |                                    |
| SmR     | AGGGCTTATTATGCACGCTT                     |                                    |
| fusionF | GTCCTGCTCGACCGCTACGT                     |                                    |
| fusionR | CAGCACGGTGGCGCAGATCG                     |                                    |
| mtrAF   | CCCAAGCTTCGACATACACGCCGACACAA            | Complementary plasmids             |
| mtrAR   | CCCAAGCTTTCACGAGACCGGACCGGCCT            |                                    |
| mtrABR  | CCCAAGCTTTCACGAACGGACCTCCTCGG            |                                    |
| pNVF    | CCCAAGCTTGGCACTGGCCGTCG                  |                                    |
| pNVR    | CCCAAGCTTGTGCCCGCTGAACTTCTTC             |                                    |
| mraZF   | TACGAGATCGGCGGCCGCATCTGATCCCAGGAGGTGGCGG | <i>mraZ</i> overexpression plasmid |
| mraZR   | GTCGGAATTCGCCGGGGCGCTTAGAATTCGATCCCCAGGG |                                    |

|         |                                            |                                                                                                    |
|---------|--------------------------------------------|----------------------------------------------------------------------------------------------------|
| pJVF    | GCGCCCCGGCGAATTCCGACG                      | All acetamide-inducible plasmids                                                                   |
| pJVR    | ATGCGGCCCGCGATCTCGTAA                      |                                                                                                    |
| mraZASF | TACGAGATCGGCGGCCGCATCCCCAGGGATGTGCCCTCCA   | <i>mraZ</i> antisense expression vector                                                            |
| mraZASR | GTCGGAATTCGCCGGGGCGCGACCCCAACGACTCCGAGCG   |                                                                                                    |
| pNVF2   | AAGCTTGTGCCCGCTGAACT                       | Overexpression plasmids carrying the genes involved in peptidoglycan homeostasis and cell division |
| pNVR2   | GGCACTGGCCGTCGTTTTAC                       |                                                                                                    |
| murcF   | AGTTCAGCGGGCACAAGCTTGCCGCCGAAAGGCACGGCG    |                                                                                                    |
| murcR   | GTAAAACGACGGCCAGTGCCTCATGACCCCGTCCCGCTCCC  |                                                                                                    |
| murdF   | TTCAGCGGGCACAAGCTTCGAGCACATCGGGGTGACGGAC   |                                                                                                    |
| murdR   | GTAAAACGACGGCCAGTGCCTCACCTCCCGGCGACCCGGCC  |                                                                                                    |
| mureF   | AGTTCAGCGGGCACAAGCTTACGGAGAACGAGAGGCGGGT   |                                                                                                    |
| mureR   | GTAAAACGACGGCCAGTGCCTCATGAGGTGTTGTCCTCCGT  |                                                                                                    |
| murfF   | AGTTCAGCGGGCACAAGCTTCGGACGGAGGACAACACCTC   |                                                                                                    |
| murfR   | GTAAAACGACGGCCAGTGCCTCATTCCGGACATCTCCTCACC |                                                                                                    |
| murgF   | AGTTCAGCGGGCACAAGCTTATCCACCGGGGACGGGAGCG   |                                                                                                    |
| murgR   | GTAAAACGACGGCCAGTGCCTCAACGCCGTGCCTTTCCGGC  |                                                                                                    |
| murjF   | AGTTCAGCGGGCACAAGCTTCGTGTCGAGGAGGTCTACGG   |                                                                                                    |
| murjR   | GTAAAACGACGGCCAGTGCCTCACCGGGTGAGTTGTACCTC  |                                                                                                    |
| mrayF   | AGTTCAGCGGGCACAAGCTTCGTGGTGAGGAGATGTCCGA   |                                                                                                    |



---

|        |                                           |
|--------|-------------------------------------------|
| mrayR  | GTAAAACGACGGCCAGTGCCTCACCCCGATGTGCTCGCGAG |
| ftswF  | AGTTCAGCGGGCACAAGCTTGGGTCGCCGGGAGGTAGGGC  |
| ftswR  | GTAAAACGACGGCCAGTGCCTCATCGCTCCCGTCCCCGGTG |
| ftsiF  | AGTTCAGCGGGCACAAGCTTGACCTGCGAAAGGCCCTCG   |
| ftsiR  | GTAAAACGACGGCCAGTGCCTCACTGCGCCTGCAGGATCAG |
| ripaF  | AGTTCAGCGGGCACAAGCTTCGGTTATCGGAAGGTGAAAC  |
| ripaR  | GTAAAACGACGGCCAGTGCCTCAGGTCAGCCGGACGACCAT |
| cwloF  | AGTTCAGCGGGCACAAGCTTCCAGGAAGAAAGAGGAAATC  |
| cwloR  | GTAAAACGACGGCCAGTGCCTCAGTAGTAGCGGGTCGCACC |
| mepaF  | AGTTCAGCGGGCACAAGCTTGCCGTTCTGGCCGTCGCCGC  |
| mepaR  | GTAAAACGACGGCCAGTGCCTCAGCTGCCGAAGGGGATGGA |
| ftsexF | AGTTCAGCGGGCACAAGCTTTTCGTGTGATCAGTGCTTCCC |
| ftsexR | GTAAAACGACGGCCAGTGCCTCACTGCCGAACCGTCACCCT |
| ftskF  | AGTTCAGCGGGCACAAGCTTTCTGCGGGGTGGATGGGCGG  |
| ftskR  | GTAAAACGACGGCCAGTGCCTCAGCCCACCGGCGCCTCGTC |
| ftslF  | AGTTCAGCGGGCACAAGCTTTCGTATCGACGGGAGAACCCC |
| ftslR  | GTAAAACGACGGCCAGTGCCTCAGTAGAGCGGGCCGGGGAC |
| sepfF  | AGTTCAGCGGGCACAAGCTTATCAGGAAGGTCCCCGGAAG  |
| sepfR  | GTAAAACGACGGCCAGTGCCTCAGCGACGGAACGCGCCGTT |

---

|           |                                              |                                                       |
|-----------|----------------------------------------------|-------------------------------------------------------|
| sepivaF   | AGTTCAGCGGGCACAAGCTTTGAAGGGACGAGTGTGTACC     |                                                       |
| sepivaR   | GTAAAACGACGGCCAGTGCCTCAGTAGTCCCCGTACCCGTC    |                                                       |
| envcF     | AGTTCAGCGGGCACAAGCTTACCGAACTCCGAGGTTTCCC     |                                                       |
| envcR     | GTAAAACGACGGCCAGTGCCTCAGACGGCGACACCCTGCGC    |                                                       |
| whmdF     | AGTTCAGCGGGCACAAGCTTCGTAACACGAGGGGATGACC     |                                                       |
| whmdR     | GTAAAACGACGGCCAGTGCCTCACATCACGGCGTCACGCTT    |                                                       |
| mtrAD56NF | CCTGCTGAACCTCATGCTCC                         | MtrA phosphorylation-defective and -<br>mimic vectors |
| mtrAD56EF | CCTGCTGGAGCTCATGCTCC                         |                                                       |
| mtrAD56NR | CGAGACCGGACCGGCCTTGTAC                       |                                                       |
| pNVD56NF  | GTACAAGGCCGGTCCGGTCTCG                       |                                                       |
| pNVD56NR  | GGAGCATGAGGTTTCAGCAGG                        |                                                       |
| pNVD56ER  | GGAGCATGAGCTCCAGCAGG                         |                                                       |
| envZF     | AAATGGGTGCGGGATCCGAATTCTTAAGCCATCAGATGGCGCA  | EnvZ <sub>del</sub> expression vector                 |
| envZR     | GCTCGAGTGCGGCCGCAAGCTTTTACCCTTCTTTTGTCGTGCCC |                                                       |
| pETF      | AAGCTTGCGGCCGCACTCGAGCA                      |                                                       |
| pETR      | GAATTCGGATCCGCGACCCATTGTC                    |                                                       |
| mtrAF     | GGGAATTC <b>CATATGG</b> TGACAATGACCCCGAAGAT  | MtrA expression vector                                |
| mtrAR     | CCCA <b>AGCTT</b> TACGAGACCGGACCGGCCT        |                                                       |
| pETF2     | CCCA <b>AGCTT</b> GCGGCCGCACTCGAGCACCACC     |                                                       |
| pETR2     | GGGAATTC <b>CATATGG</b> GCTGCCGCGCGGCACCAGGC |                                                       |

---

|          |                                       |      |
|----------|---------------------------------------|------|
| mraZDIGF | AGGTGGGGAGAAGTGGGGCG (5'-Digoxigenin) | EMSA |
| mraZDIGR | CCGCCACCTCCTGGGATCAG                  |      |

---

## References

1. Wang X-B, Chi C-Q, Nie Y, Tang Y-Q, Tan Y, Wu G, Wu X-L. 2011. Degradation of petroleum hydrocarbons (C6–C40) and crude oil by a novel *Dietzia* strain. *Bioresource Technology* 102:7755-7761.
2. Szvetnik A, Bihari Z, Szabo Z, Kelemen O, Kiss I. 2010. Genetic manipulation tools for *Dietzia* spp. *Journal of Applied Microbiology* 109:1845-1852.
3. Van Kessel JC, Hatfull GF. 2007. Recombineering in *Mycobacterium tuberculosis*. *Nature Methods* 4:147-152.
